# Supplementary material for: KDM5 Interacts with Foxo to Modulate Cellular Levels of Oxidative Stress
Source: PubMed Central journal article supplement (PMC4199495; doi:10.1371/journal.pgen.1004676), 2014-10-16
Supplement: pgen.1004676.s011.pdf [file pgen.1004676.s011.pdf]

**Table S1: Adult survival of *kdm5* alleles.**

| <i>kdm5</i> allele combination                  | number of <i>kdm5</i> mutants | total adult flies | Expected number | % expected | <i>p</i> value (Chi squared) |
|-------------------------------------------------|-------------------------------|-------------------|-----------------|------------|------------------------------|
| <i>kdm5</i> [10424/10424]; +/+                  | 3                             | 650               | 216             | 1.40%      | < 0.001                      |
| <i>kdm5</i> [10424/10424];<br><i>gKDM5</i> /+   | 40                            | 110               | 37              | 108%       | ns                           |
| <i>kdm5</i> [K06801/K06801]; +/+                | 0                             | 300               | 100             | 0%         | < 0.001                      |
| <i>kdm5</i> [K06801/K06801];<br><i>gKDM5</i> /+ | 39                            | 125               | 42              | 93%        | ns                           |
| <i>kdm5</i> [10424/K06801]; +/+                 | 87                            | 440               | 147             | 59%        | < 0.001                      |
| <i>kdm5</i> [10424/K06801];<br><i>gKDM5</i> /+  | 70                            | 200               | 67              | 104%       | ns                           |

Crosses were carried out to generate the genotypes indicated in the left-most column.
