# Supplementary material for: KDM5 Interacts with Foxo to Modulate Cellular Levels of Oxidative Stress
Source: PubMed Central journal article supplement (PMC4199495; doi:10.1371/journal.pgen.1004676), 2014-10-16
Supplement: pgen.1004676.s012.pdf [file pgen.1004676.s012.pdf]

**Table S2: Primers used in this study.**

| RT-PCR primers |                        |
|----------------|------------------------|
| Rp49 fw        | CAGGCCCAAGATCGTGAAGAA  |
| Rp49 RV        | TGCGCTTGTTGATCCGTAA    |
| cyp4e2 FW      | CTGCTGCTGGTTGCATATCT   |
| cyp4e2 RV      | ATTTCTGACGGATTCTTGCC   |
| CG10211 FW     | AACTCATTGAGGCTGCTGTG   |
| CG10211 RV     | GCCACACTTCGTACTIONGAAA |
| GSTE1 FW       | CAAGTATGCCAAGTCGGATG   |
| GSTE1 RV       | CACTGGCATCGAAGAAGAGA   |
| 4E-BP FW       | CTTATCTACGAGCGGGCTTT   |
| 4E-BP RV       | GAAGGGAGTACGCGGAGTT    |
| l(2)efl FW     | CTTCTCCTCATGCTTTCCCT   |
| l(2)efl RV     | CAACATCGACAGCGAGAAGT   |
| Rala FW        | GTTTCCTTTGCGTCTTCTCC   |
| Rala RV        | CCGCAAGATTTGTTCTCTGA   |
| Gadd45 FW      | GAACTGGACCTGGAGCTAGAGA |
| Gadd45 RV      | AAAAGGCCTCCAGCAGTACCT  |
| pr-set7 FW     | CAACAAAGCAGGCATGAAAA   |
| pr-set7 RV     | GTGGCGTACTTGGAGACCAT   |
| mth1 FW        | TCTCTCGATCTTCGCCTACTTC |
| mth1 RV        | GTGACACCCATAACGACGACTA |
| Glaz FW        | GAACTTCGCCATCTTGTGGT   |
| Glaz RV        | GGGCATTGTTTGTGTTTTGCT  |
| CG3714FW       | ACTGCAACAGCAACAGGAAC   |
| CG3714RV       | TGAAATTCAGCAAGCCACTC   |
| spirit FW      | CCCTTATCGCCAACAACCTTT  |
| spirit RV      | GCAGCGCAATATCGTTGTAT   |
| Nox FW         | GCGGGAGTCATGGAGATATT   |
| Nox RV         | ATGATGGACTGCAGAATGGA   |
| plod FW        | ACCGATACGAAGAAGGGATG   |
| plod RV        | ACGGATCGATGAAGGAAATC   |
| CG33099FW      | ACCATGGGATAGCAGAGGAC   |
| CG33099RV      | GCAAACATTGTAGGCGTGAC   |
| Prx2540-1 FW   | GACGAGGAGCAGAAGAAGGA   |
| Prx2540-1 RV   | AGGGAGTCAATGGTCCTCAG   |
| Prx2540-2 FW   | AAGAGCTATTGCCTGGACATTC |
| Prx2540-2 RV   | GGAGTCAATGGTCCTCAGAATC |
| Xbp1 FW        | GACCATCTAACCTGGGAGGA   |
| Xbp1 RV        | TTTCCGTTCTGTCTGTCAGC   |
| Gyc-89daFW     | TTGAGTTCGAGTTGATTCCG   |

|             |                        |
|-------------|------------------------|
| Gyc-89da RV | CCATAGTTTGGGCTTCGTTT   |
| Gkt FW      | GGGATACTGGACAAGCCACT   |
| Gkt RV      | CGAGGAACATCATCTTGGTG   |
| CG5316 FW   | AATCGCAGTGGTCATAGCAG   |
| CG5316 RV   | GGAGACGGAAGCACAATCTT   |
| CG12896 FW  | CTCTCCATGTTTTACCCCATGT |
| CG12896RV   | AAATCCCTTGGGGAAGAGTTTA |
| InR FW      | GCGATGATCGCTGGAAGGTT   |
| InR RV      | GCGATGATCGCTGGAAGG TT  |
| HDAC4_FW    | TCCCGAGGTCAAACAGATTC   |
| HDAC4_RV    | GCGGCTGAGGTATTTTGTA    |

**ChIP primers**

|                       |                             |
|-----------------------|-----------------------------|
| 4E-BP promoter FW     | GAATGCGATTGGCGTTTAGT        |
| 4E-BP promoter RV     | CTCGCCTTGAGCTCTTGTTT        |
| CG5316 promoter FW    | CATGCACAGAGGTAAACAACAGT     |
| CG5316 promoter RV    | GGATGCCGATATGAGGGTTA        |
| sprit promoter fw     | TTCAATGAGCCAAATCCAAG        |
| sprit promoter rv     | TTTGATAGCAGCCAGAATCG        |
| Prx2540-2 promoter FW | TCACACACATGACACCATGC        |
| Prx2540-2 promoter RV | AATAGCGGGTGCGATAGAGA        |
| InR-RA promoter FW    | TGGTTTAAATTGGTTTTACAGCAG    |
| InR-RA promoter RV    | CATGCAATCAAGCATAATCATTT     |
| puc promoter FW       | TCC CTC TCT CTT GCT CTC TTG |
| puc promoter RV       | AAT GAA ATG GAG ACG CTT ACG |
| CG10211 promoter FW   | CCTGTCCCATGCTGTGTAGTT       |
| CG10211 promoter RV   | GACTCTCTTTTGGCCCACAC        |
| l(2)efl promoter FW   | CGTGGGGGAAGATGTAAACAA       |
| l(2)efl promoter RV   | CTCGAGCACTCACACGATTTTA      |
| 4E-BP FW -1322        | CTG TCC CAC ATC GAG ATC AT  |
| 4E-BP RV -1129        | ACG ATT CGA CGT AAT TCG G   |
| l(2)efl Fw -981       | TTT AGG GAC TGG CCC TGT AG  |
| l(2)efl RV -915       | GGT GAT TGC CTC ACT GTT TG  |
| spirit FW +3594       | CAG CAT CTG GAT CTT GCA GT  |
| spirit RV+3694        | CAA GCA AAT GCC GGA TAA C   |
| CG10211 FW +14704     | TCT GCA ACT GTG TAC GAG CA  |
| CG10211 RV+14798      | ACC CAA ACC ATC TTG GTA GC  |
| CG5316 FW+2423        | CAA CAT TCA AGG CAA CAT CC  |
| CG5316 RV+2570        | CAT ATC GAT GGA GCT GTC GT  |
| prx2540 FW +1475      | ATA TCC GAG TCG AGG CTG AG  |
| prx2540-2 RV +1567    | GTG CGA ACG AGA AAG TTC AA  |
